# Supplementary material for: Characterizing stochastic water age in premise plumbing systems using conventional and advanced statistical tools
Source: Royal Society of Chemistry journal article supplement (doi:10.1039/d2ew00872f), 2023-01-01

## Supplementary Appendix

# A statistical approach to characterizing water age in premise plumbing systems

Emily Clements, Christopher Irwin, Jacob Koestner, Alexandros Taflanidis, Kyle Bibby, Robert Nerenberg\*

University of Notre Dame, Department of Civil and Environmental Engineering and Earth Sciences 156 Fitzpatrick Hall, Notre Dame, IN 46556, USA

\*Corresponding author

E-mail address: nerenberg.1@nd.edu

**The following is included as a supplementary appendix for this paper:**

**Table S1.** EPANET nodes and elevations

| <b>ID</b>      | <b>ELEVATION</b> |
|----------------|------------------|
| <b>1</b>       | -0.5             |
| <b>2</b>       | 2                |
| <b>3</b>       | 2.65             |
| <b>4</b>       | 2.9              |
| <b>5</b>       | 2                |
| <b>6</b>       | 2                |
| <b>7</b>       | 2                |
| <b>8</b>       | 2                |
| <b>BRTAP_1</b> | 0.8              |
| <b>WC_1</b>    | 0.75             |
| <b>10</b>      | 2.65             |
| <b>11</b>      | 2.65             |
| <b>12</b>      | 1                |
| <b>13</b>      | 1                |
| <b>KTAP</b>    | 0.8              |
| <b>15</b>      | 1                |
| <b>DW</b>      | 0.5              |
| <b>KTAP_H</b>  | 0.8              |
| <b>18</b>      | 1.15             |
| <b>19</b>      | 1.15             |
| <b>20</b>      | 2.65             |
| <b>21</b>      | 2.65             |
| <b>22</b>      | 2.65             |

|           |      |
|-----------|------|
| 23        | 2.9  |
| 24        | 3.65 |
| 25        | 4    |
| WC_2      | 3.65 |
| 28        | 4    |
| 29        | 4    |
| BRTAP_2   | 3.7  |
| 31        | 4    |
| SHOWER    | 3.9  |
| 33        | 4.15 |
| 34        | 4.15 |
| 35        | 4.15 |
| 36        | 4.15 |
| SHOWER_H  | 3.9  |
| BRTAP_2_H | 3.7  |
| 40        | 5.58 |
| 41        | 5.58 |
| 43        | 6.28 |
| WM        | 6.28 |
| 45        | 7.28 |
| 46        | 7.28 |
| 14        | 5.78 |
| 16        | 5.78 |
| 17        | -1   |

**Table S2.** EPANET reservoirs

| ID | HEAD |
|----|------|
| 9  | 30   |

**Table S3.** EPANET pipe information. The roughness was 0.05 and the minor loss was 0 for all pipes

| ;ID | NODE1 | NODE2   | LENGTH | DIAMETER |
|-----|-------|---------|--------|----------|
| 1   | 1     | 2       | 1      | 25.6     |
| 2   | 3     | 2       | 1.65   | 25.6     |
| 3   | 4     | 3       | 0.2    | 19.8     |
| 4   | 2     | 6       | 0.235  | 10       |
| 5   | 6     | 5       | 1.079  | 10       |
| 6   | 6     | 7       | 0.264  | 10       |
| 7   | 7     | WC_1    | 0.25   | 10       |
| 8   | 5     | 8       | 0.262  | 10       |
| 9   | 8     | Brtap_1 | 0.2    | 10       |
| 10  | 3     | 10      | 2.337  | 13       |

|    |        |           |       |      |
|----|--------|-----------|-------|------|
| 11 | 10     | 11        | 1.332 | 13   |
| 12 | 11     | 12        | 1.575 | 13   |
| 13 | 12     | 13        | 0.725 | 13   |
| 14 | 13     | 15        | 0.31  | 10   |
| 15 | 13     | Ktap      | 0.2   | 10   |
| 16 | 15     | DW        | 0.5   | 10   |
| 17 | Ktap_H | 18        | 0.35  | 13   |
| 18 | 18     | 19        | 0.413 | 13   |
| 19 | 19     | 20        | 1.44  | 13   |
| 20 | 20     | 21        | 1.447 | 13   |
| 21 | 21     | 22        | 2.49  | 13   |
| 22 | 22     | 23        | 0.2   | 13   |
| 23 | 4      | 24        | 0.75  | 19.8 |
| 24 | 24     | 25        | 0.35  | 19.8 |
| 26 | WC_2   | 24        | 0.747 | 10   |
| 27 | 25     | 28        | 1.358 | 13   |
| 28 | 28     | 31        | 0.64  | 13   |
| 29 | 31     | 29        | 0.76  | 10   |
| 30 | 31     | Shower    | 0.1   | 10   |
| 31 | 29     | Brtap_2   | 0.3   | 10   |
| 32 | 33     | 23        | 1.25  | 13   |
| 34 | 33     | 34        | 1.465 | 13   |
| 35 | 34     | 35        | 0.479 | 13   |
| 36 | 35     | Shower_H  | 0.25  | 10   |
| 37 | 35     | 36        | 0.761 | 10   |
| 38 | 36     | Brtap_2_H | 0.45  | 10   |
| 41 | 43     | 45        | 1     | 19.8 |
| 42 | 45     | 46        | 0.1   | 19.8 |
| 48 | 41     | 33        | 1.43  | 19.8 |
| 49 | 40     | 25        | 1.58  | 19.8 |
| 50 | WM     | 43        | 0.479 | 13   |
| 51 | 16     | 41        | 0.2   | 19.8 |
| 52 | 16     | 46        | 1.5   | 19.8 |
| 53 | 43     | 14        | 0.5   | 19.8 |
| 54 | 14     | 40        | 0.2   | 19.8 |
| 33 | 17     | 9         | 1     | 32   |
| 25 | 17     | 1         | 2     | 25   |

**Figure S1.** Water age for the fixtures at a two-person house. Note the different axes on the bottom plot. For each result, the red horizontal line is the median water age, the bottom and top edges of the box indicate the 25th and 75th percentiles, the upper and lower black horizontal lines are the most extreme data points, not including outliers which are the red points.

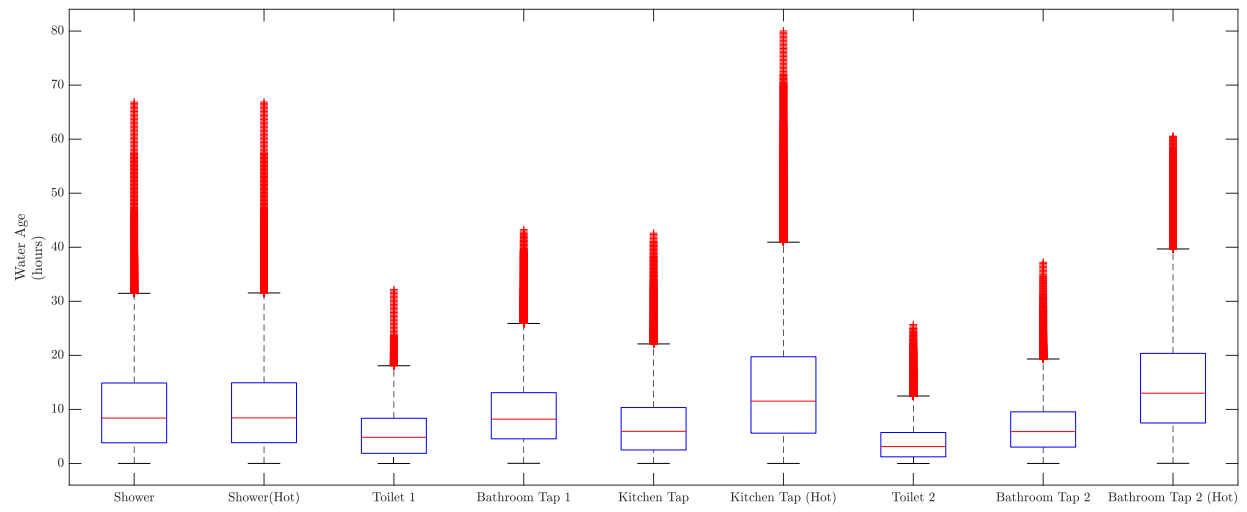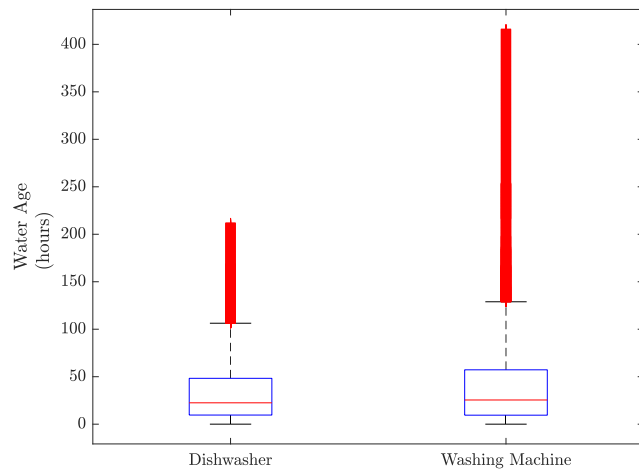

**Figure S2.** Return period analysis for the shower 0.1x, 0.5x, 0.56x, 1x, 2x, and 5x demand for two people and return period for one person

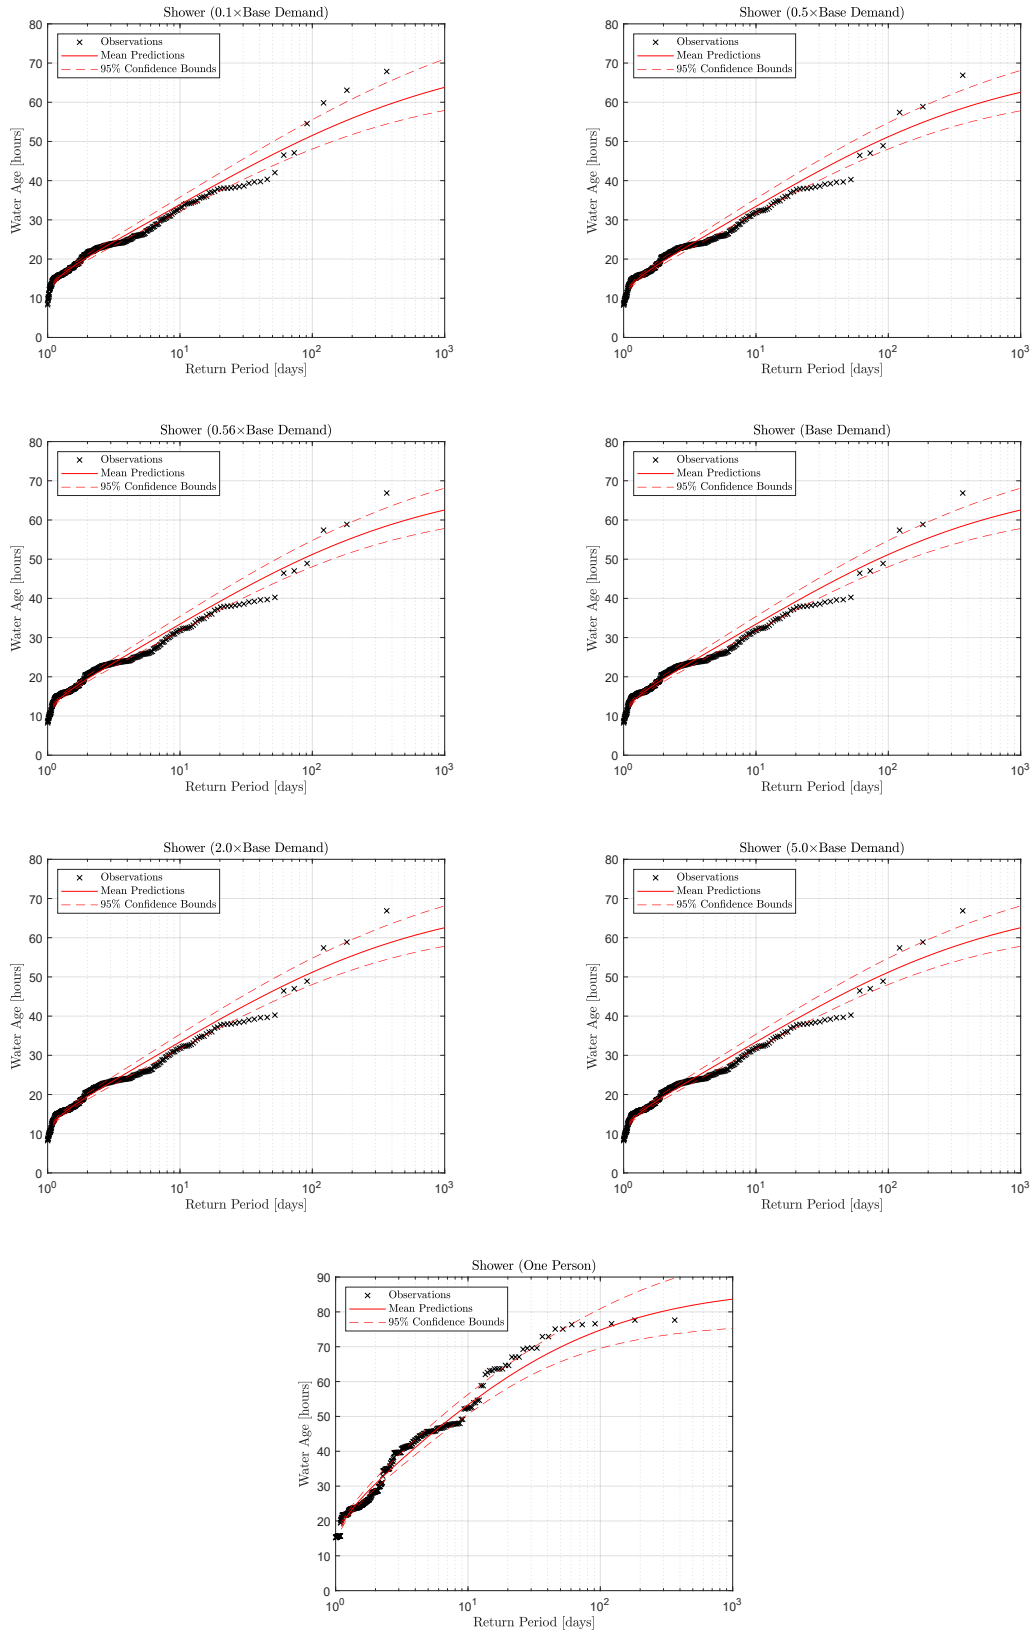

**Figure S3.** Return period analysis for the bathroom tap 2 0.1x, 0.5x, 0.56x, 1x, 2x, and 5x demand for two people and return period for one person

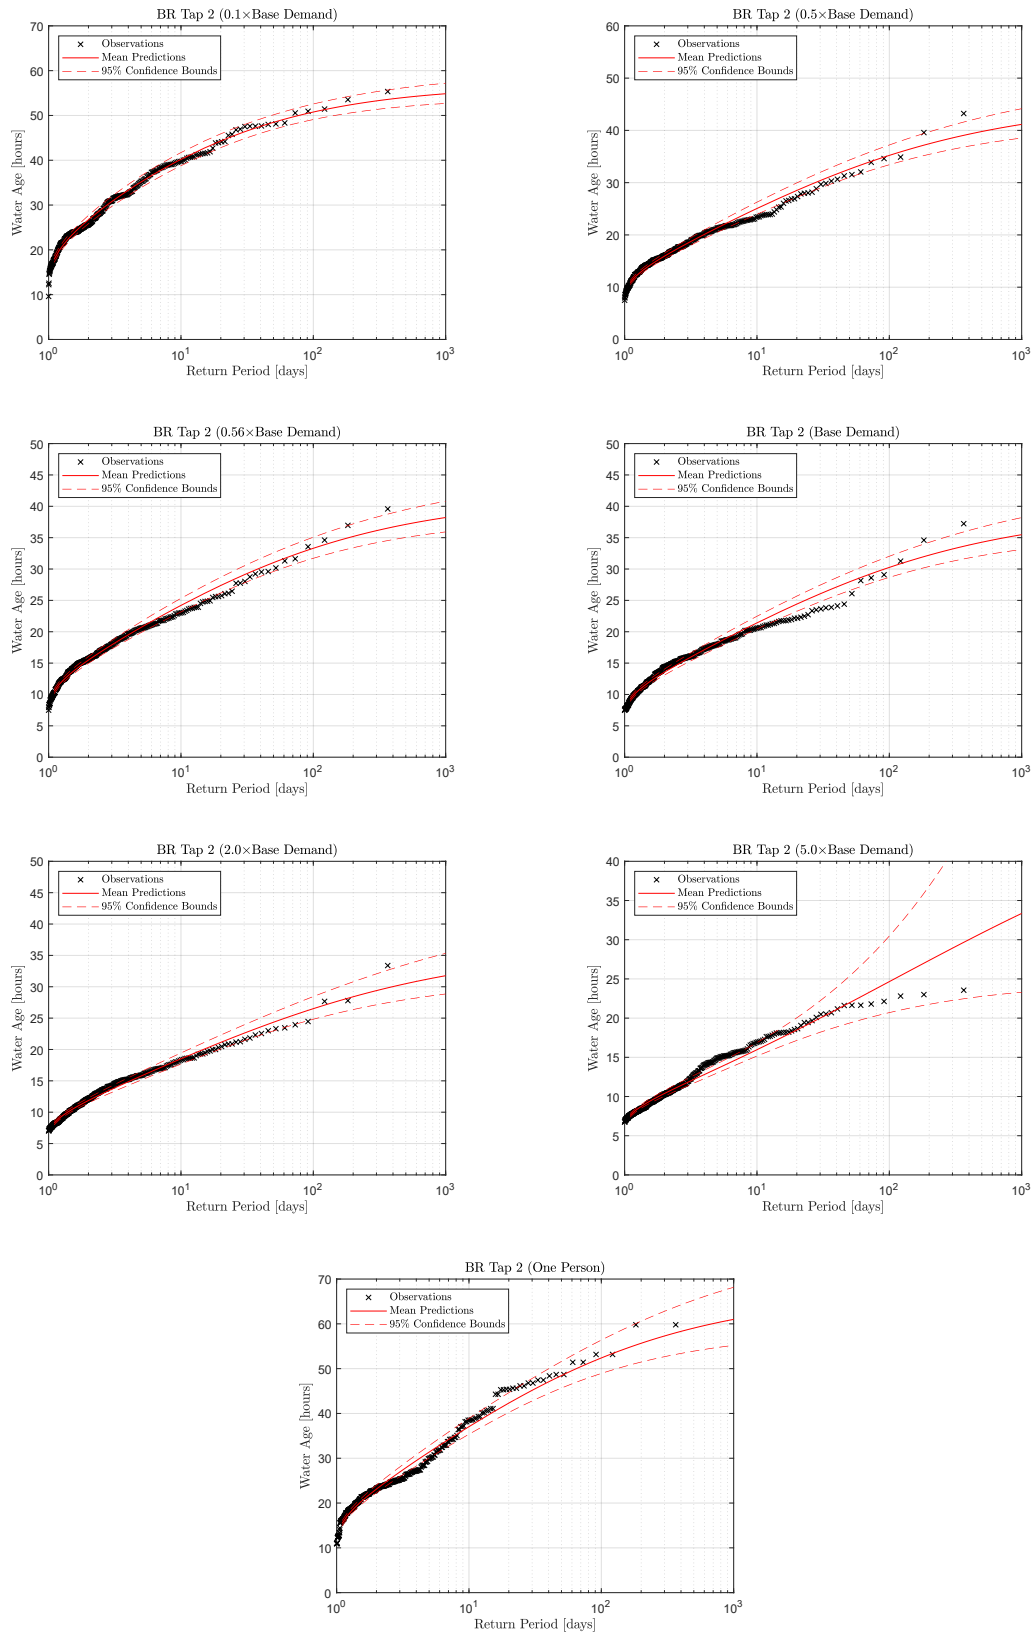

**Figure S4.** Return period analysis for the kitchen tap 0.1x, 0.5x, 0.56x, 1x, 2x, and 5x demand for two people and return period for one person

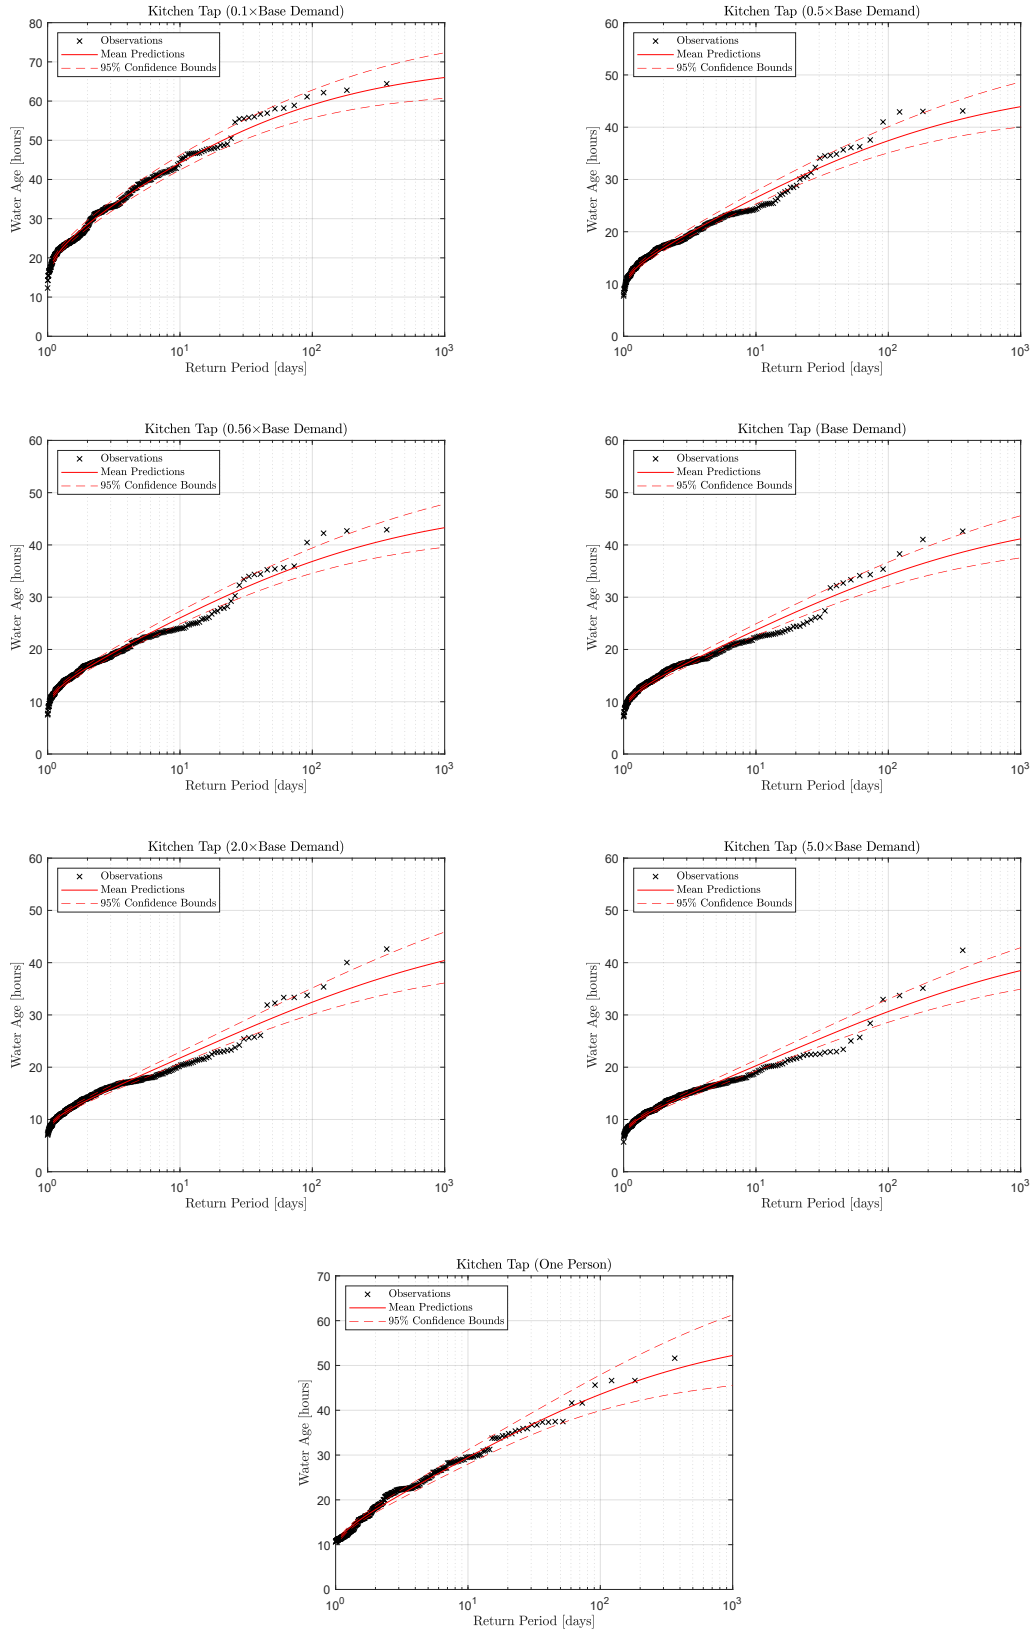

**Figure S5.** Return period analysis for the kitchen tap hot water 0.1x, 0.5x, 0.56x, 1x, 2x, and 5x demand for two people and return period for one person

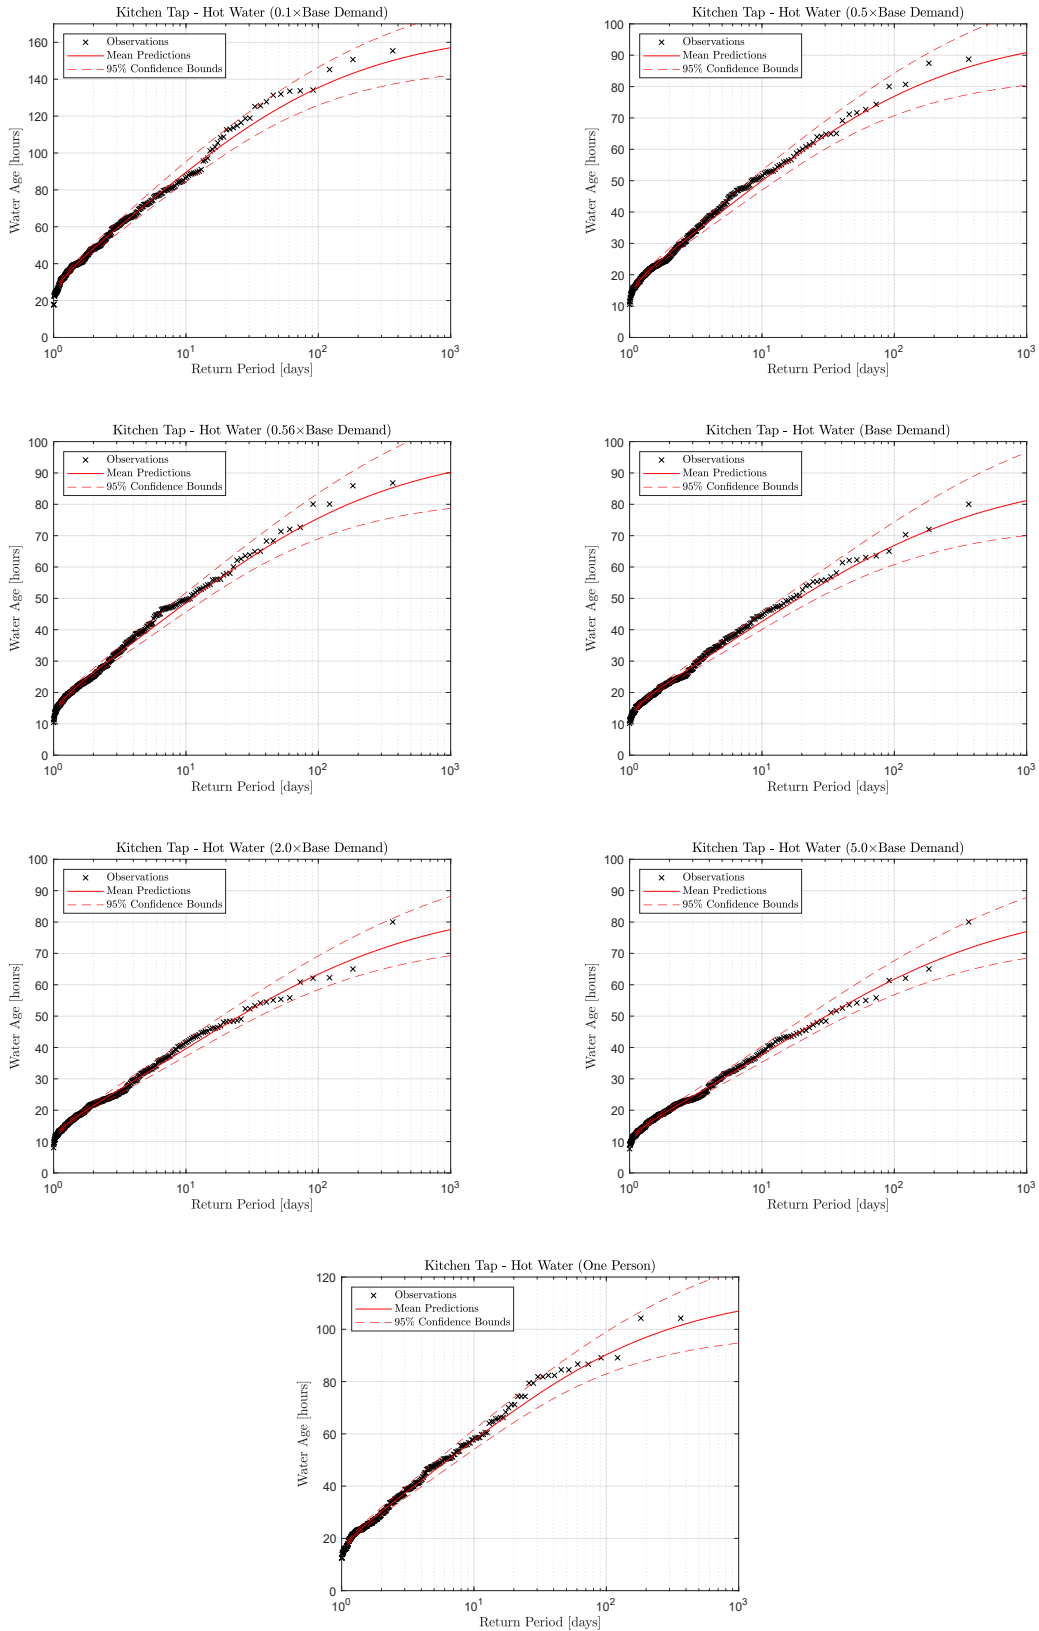

Supplement: d2ew00872f1.pdf [file d2ew00872f1.pdf]
